# Supplementary material for: Skin-on-a-chip model simulating inflammation, edema and drug-based treatment
Source: Springer Nature journal article supplement (doi:10.1038/srep37471), 2016-11-21

## Supporting information

### Title:

Skin-on-a-chip model simulating inflammation, edema and drug-based treatment

### Author list:

Maierdanjiang Wufuer<sup>1,2†</sup>, GeonHui Lee<sup>3†</sup>, Woojune Hur<sup>1,2</sup>, Byoungjun Jeon<sup>1,2</sup>, Byung Jun Kim<sup>1</sup>, Tae Hyun Choi<sup>1\*</sup> and SangHoon Lee<sup>3,4\*</sup>

<sup>1</sup> Department of Plastic and Reconstructive Surgery, Institute of Human-Environment Interface Biology, College of Medicine, Seoul Nat'l University

<sup>2</sup> Biomedical Research Institute, Seoul Nat'l Univ. Hospital

<sup>3</sup> KU-KIST Graduate School of Converging Science and Technology, Korea University, Republic of Korea

<sup>4</sup> School of Biomedical Engineering, College of Health Science, Korea University, Seoul, Republic of Korea

\*Corresponding Authors. E-mail: [dbiomed@korea.ac.kr](mailto:dbiomed@korea.ac.kr) or [psthchoi@snu.ac.kr](mailto:psthchoi@snu.ac.kr)

† These authors contributed equally as first author to this work.

**Supplementary Fig. S1.**

Schematic representation of TNF- $\alpha$  inflammation and Dex pathways.

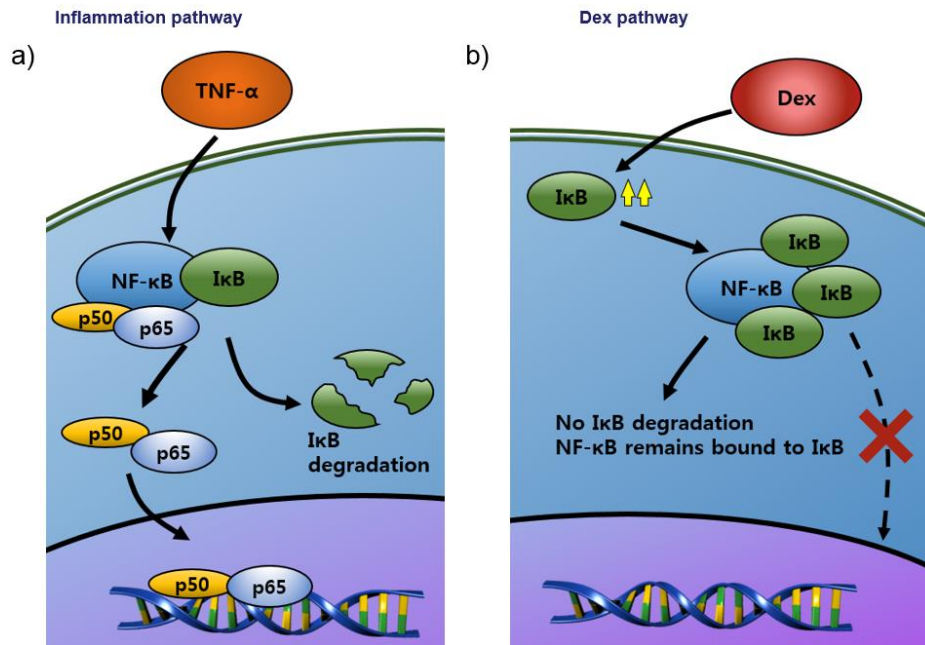

**Supplementary Fig. S2.**

Relative intensity comparison of immunocytochemical tight junction staining in HUVECs

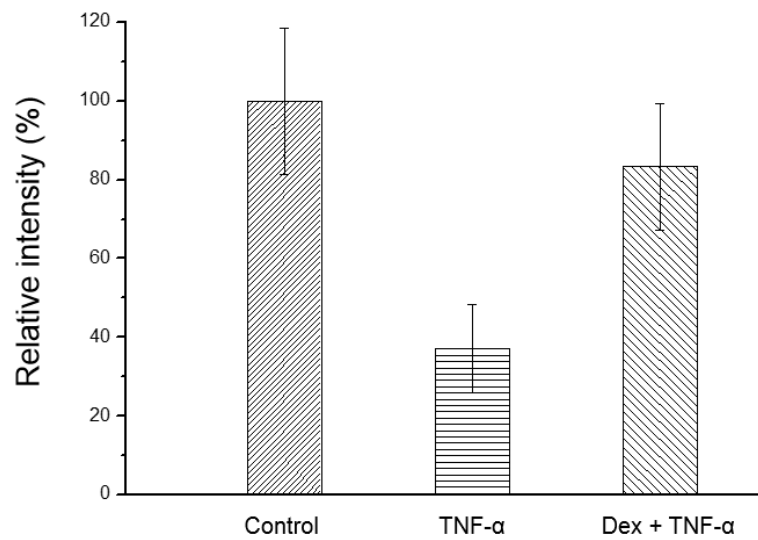

Supplement: 41598_2016_BFsrep37471_MOESM1_ESM.pdf [file 41598_2016_BFsrep37471_MOESM1_ESM.pdf]
